# Supplementary material
Source: HighWire-hosted journal article supplement (https://bmjopen.bmj.com/content/9/6/e026746)
Supplement: inline-supplementary-material-1 [file inline-supplementary-material-1.xlsx]

## Sheet: Sheet1
Supplementary Material 1 Monthly admission number during the study period
Month	All districts	Kathmandu	Most affected districts outside of Kathmandu	Less affected districts
-24	65	21	19	25
-23	62	21	18	23
-22	63	19	19	25
-21	58	17	13	28
-20	58	13	16	29
-19	46	15	10	21
-18	58	10	17	31
-17	70	14	24	32
-16	43	14	16	13
-15	56	17	19	20
-14	59	22	14	23
-13	50	11	16	23
-12	65	18	12	35
-11	72	23	18	31
-10	49	9	13	27
-9	57	18	8	31
-8	71	23	15	33
-7	46	13	10	23
-6	36	6	8	22
-5	69	22	21	26
-4	60	13	13	34
-3	67	16	21	30
-2	54	15	12	27
-1	70	17	26	27
0	42	15	16	11
1	84	19	28	37
2	89	23	29	37
3	87	19	18	50
4	86	20	29	37
5	87	22	30	35
6	100	22	39	39
7	91	16	33	42
8	112	21	25	66
9	99	22	35	42
10	102	19	39	44
11	107	20	31	56
12	117	18	34	65
13	94	21	15	58
14	66	18	21	27
15	90	15	19	56
16	105	25	26	54
17	71	24	18	29
18	79	16	13	50
19	79	22	20	37
20	76	19	13	44
21	90	23	20	47
22	79	15	18	46
23	84	30	14	40
