# Supplementary material
Source: HighWire-hosted journal article supplement (https://bmjopen.bmj.com/content/9/6/e026746)
Supplement: inline-supplementary-material-2 [file inline-supplementary-material-2.xlsx]

## Sheet: Sheet1
Supplementary Material 2: Incidence rate ratios and their confidence intervals for the monthly admission number after the earthquake
Month	All districts	Kathmandu	Most afffected districts outside of Kathmandu	Less affected districts
0	0.66 (0.43–1.00)*	0.79 (0.40–1.58)	1.03 (0.56–1.90)	0.37 (0.19–0.74)*
1	1.29 (0.98–1.69)	0.91 (0.57–1.44)	1.54 (0.88–2.69)	1.37 (1.01–1.85)
2	1.59 (1.23–2.05)***	1.64 (1.13–2.40)*	1.81 (1.13–2.91)*	1.42 (1.03–1.97)*
3	1.50 (1.01–2.24)*	1.08 (0.54–2.13)	1.71 (1.05-2.79)*	1.72 (1.08–2.73)*
4	1.34 (0.99–1.81)	0.99 (0.52–1.88)	1.87 (1.29–2.71)**	1.24 (0.83–1.84)
5	1.89 (1.40–2.56)***	1.57 (0.96–2.57)	3.00 (1.95–4.62)***	1.59 (1.02–2.49)*
6	2.16 (1.53–3.04)***	2.75 (1.57–4.82)***	3.15 (1.91–5.20)***	1.47 (1.04–2.07)*
7	1.33 (0.96–1.84)	0.89 (0.54–1.45)	1.56 (0.87–2.80)	1.45 (1.09–1.93)*
8	2.27 (1.57–3.27)***	1.62 (0.97–2.70)	1.72 (1.15–2.58)**	2.81 (1.87–4.22)***
9	1.66 (1.19–2.30)**	1.33 (0.89–2.01)	1.75 (1.04–2.95)*	1.68 (1.17–2.42)**
10	1.83 (1.33–2.50)***	1.03 (0.63-1.67)	3.00 (1.92–4.68)***	1.78 (1.17–2.72)**
11	1.77 (1.27–2.48)**	1.43 (0.75–2.71)	1.48 (0.97–2.26)	2.20 (1.56–3.10)***
12	1.80 (1.25–2.61)**	0.94 (0.55–1.60)	2.19 (1.47–3.28)	2.12 (1.28–3.51)**
13	1.39 (0.95–2.03)	0.95 (0.57–1.60)	0.85 (0.46–1.57)	2.15 (1.52–3.03)***
14	1.18 (0.92–1.51)	1.29 (0.73-2.27)	1.31 (0.94–1.82)	1.04 (0.77–1.40)
15	1.57 (1.07–2.33)*	0.87 (0.52–1.46)	1.81 (0.92–3.54)	1.90 (1.31–2.76)**
16	1.71 (1.17–2.51)**	1.31 (0.72–2.39)	1.68 (0.92–3.07)	1.88 (1.18–3.01)**
17	1.54 (1.12–2.12)**	1.71 (1.02–2.88)*	1.80 (1.12–2.88)*	1.32 (0.86–2.01)
18	1.72 (1.12–2.66)*	2.00 (0.99–4.02)	1.08 (0.45–2.57)	1.89 (1.29–2.75)**
19	1.16 (0.87–1.56)	1.22 (0.86–1.74)	0.92 (0.52–1.61)	1.28 (0.86–1.89)
20	1.60 (1.07–2.39)*	1.55 (0.66–3.67)	0.90 (0.43–1.88)	1.87 (1.21–2.91)**
21	1.51 (1.11–2.05)*	1.39 (0.85–2.29)	1.05 (0.68–1.61)	1.88 (1.28–2.76)**
22	1.45 (0.96–2.21)	0.82 (0.42–1.59)	1.38 (0.77–2.49)	1.87 (1.15–3.05)*
23	1.37 (0.94–2.00)	2.14 (1.37–3.34)**	0.67 (0.35–1.28)	1.56 (0.99–2.47)
* p<0.05, ** p<0.01, *** p<0.001
